# Supplementary material
Source: PubMed Central journal article supplement (PMC5383440)

# Supplementary Figure 1.

a. No Tx

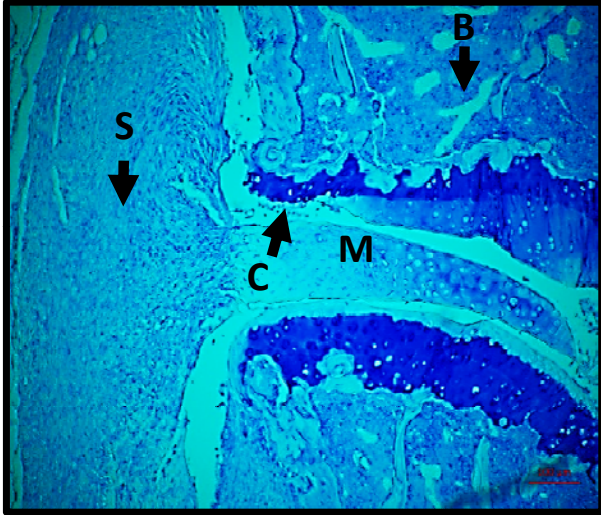

b. Saline

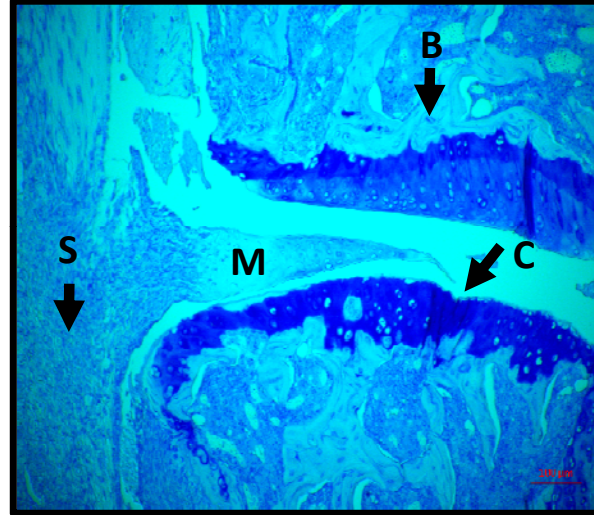

c. 10mg/kg

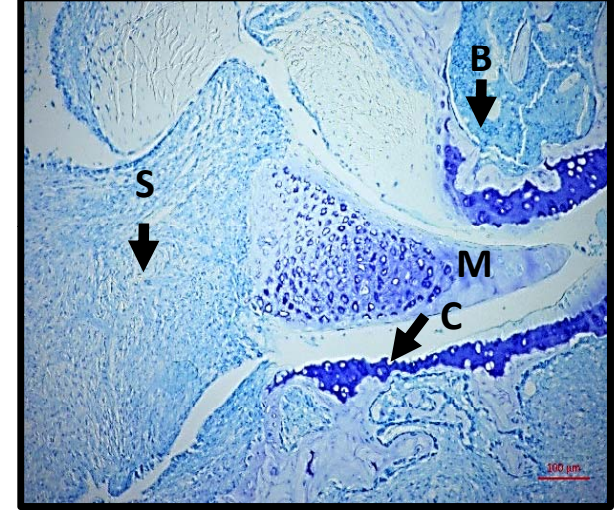

d. 30mg/kg bid

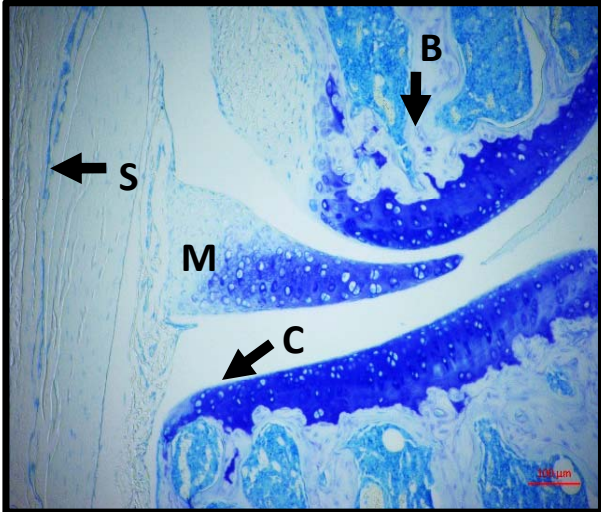

e. 30mg/kg qd

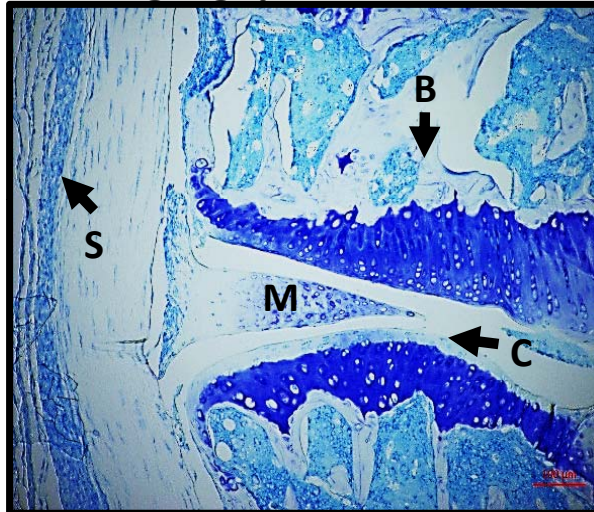

f. Dex

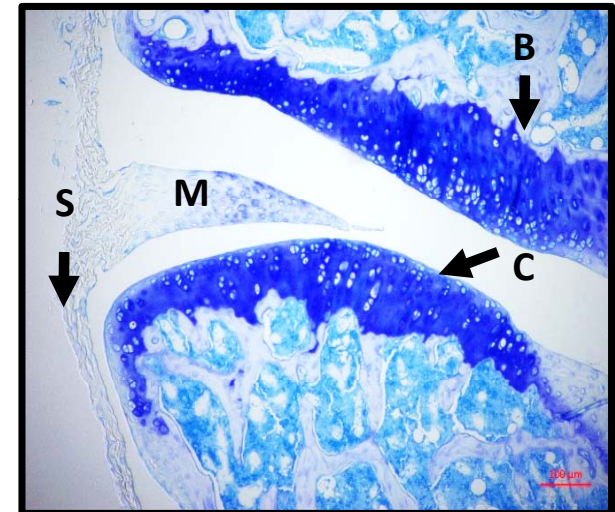

Supplementary Figure 2.

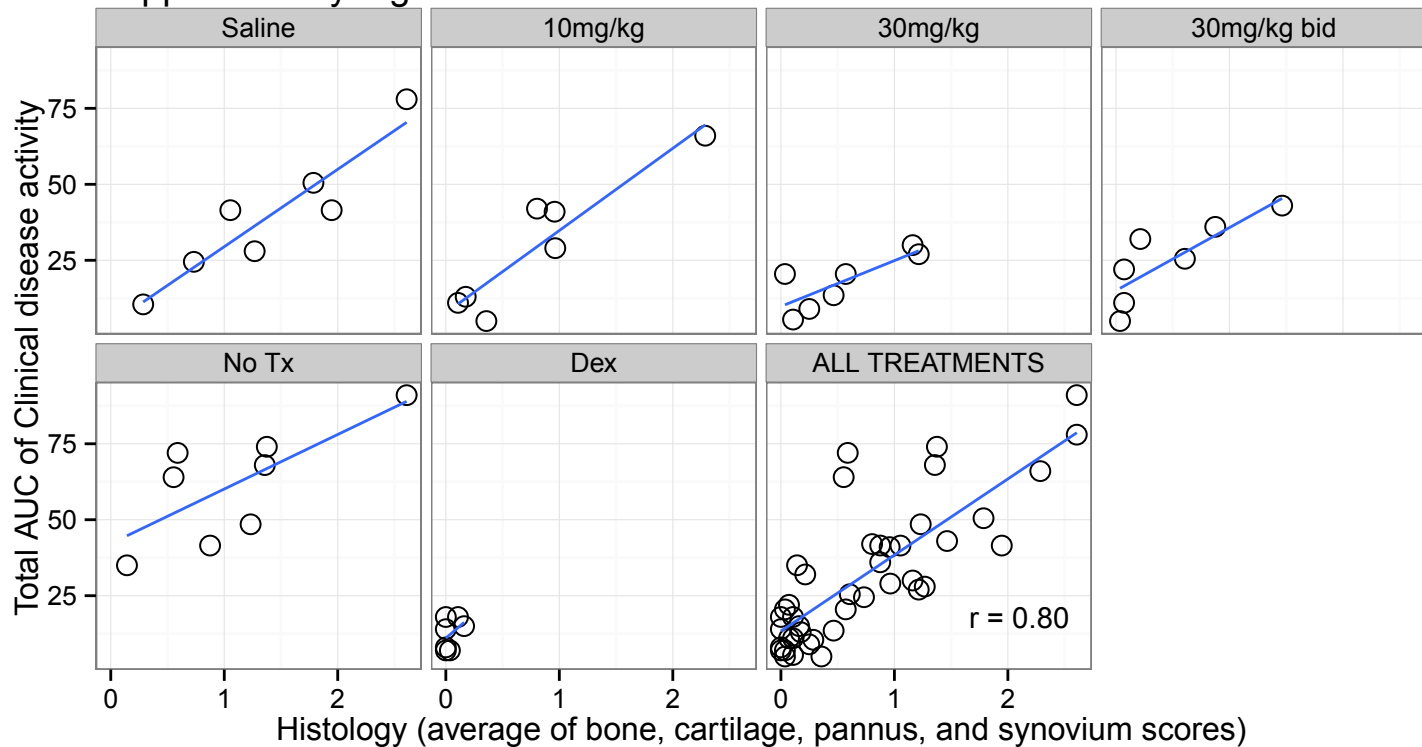



Supplementary Figure 3.

a. No Tx

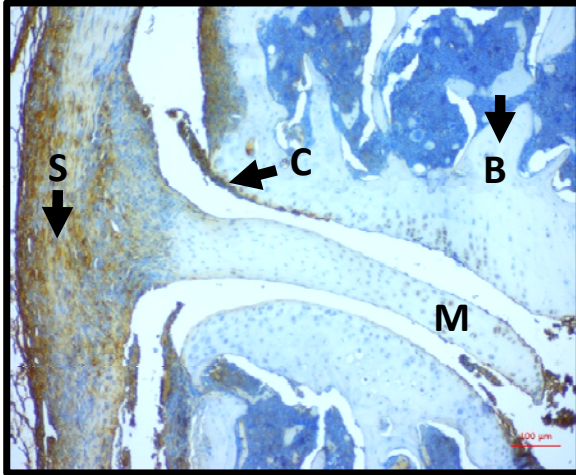

b. Saline

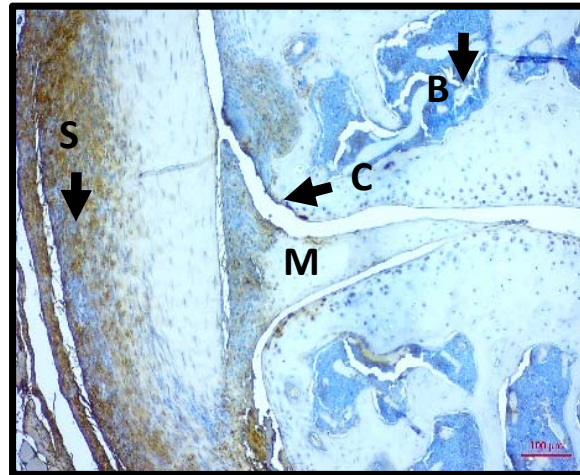

c. 10mg/kg

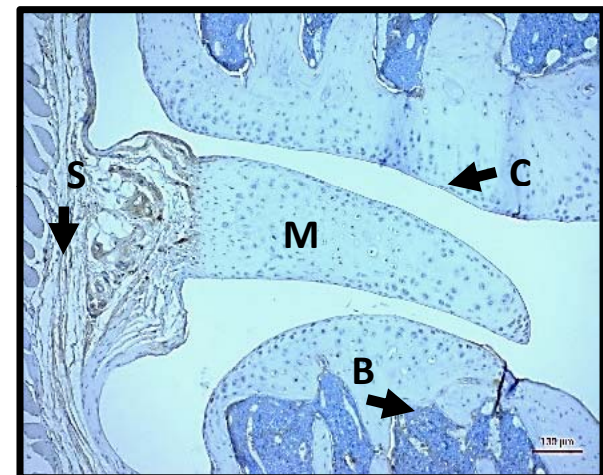

d. 30mg/kg bid

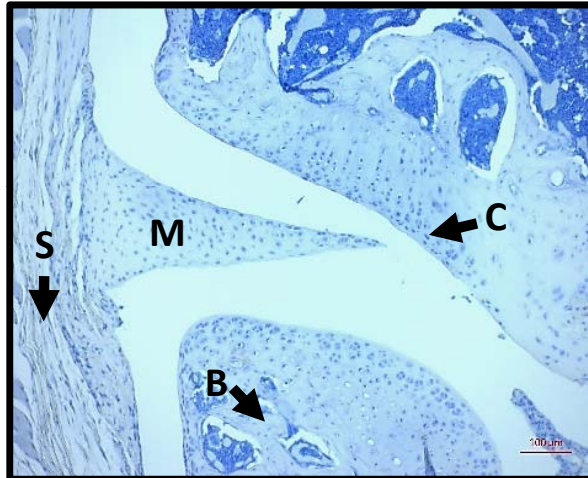

e. 30mg/kg qd

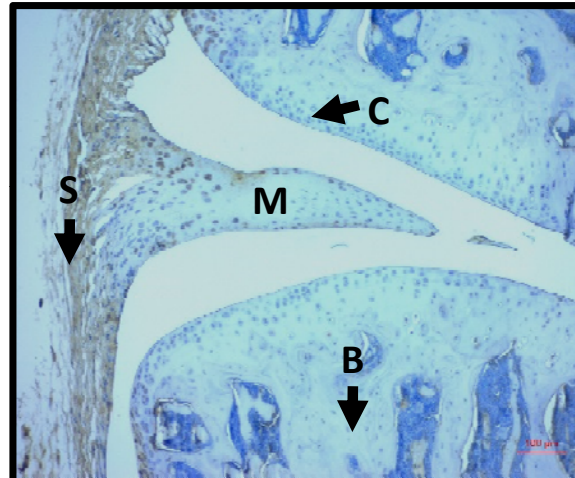

f. Dex

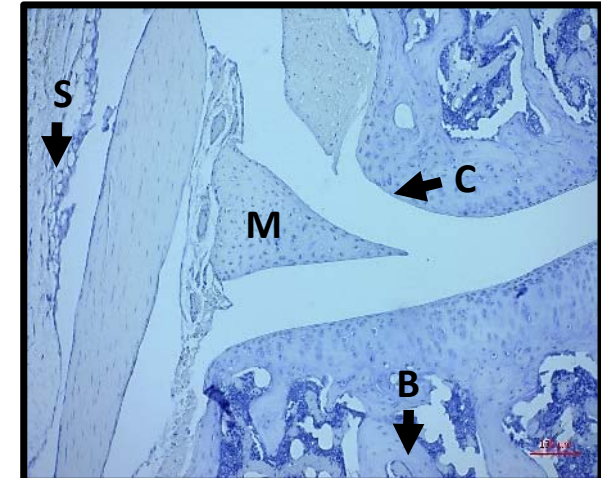

Supplementary Figure 4.

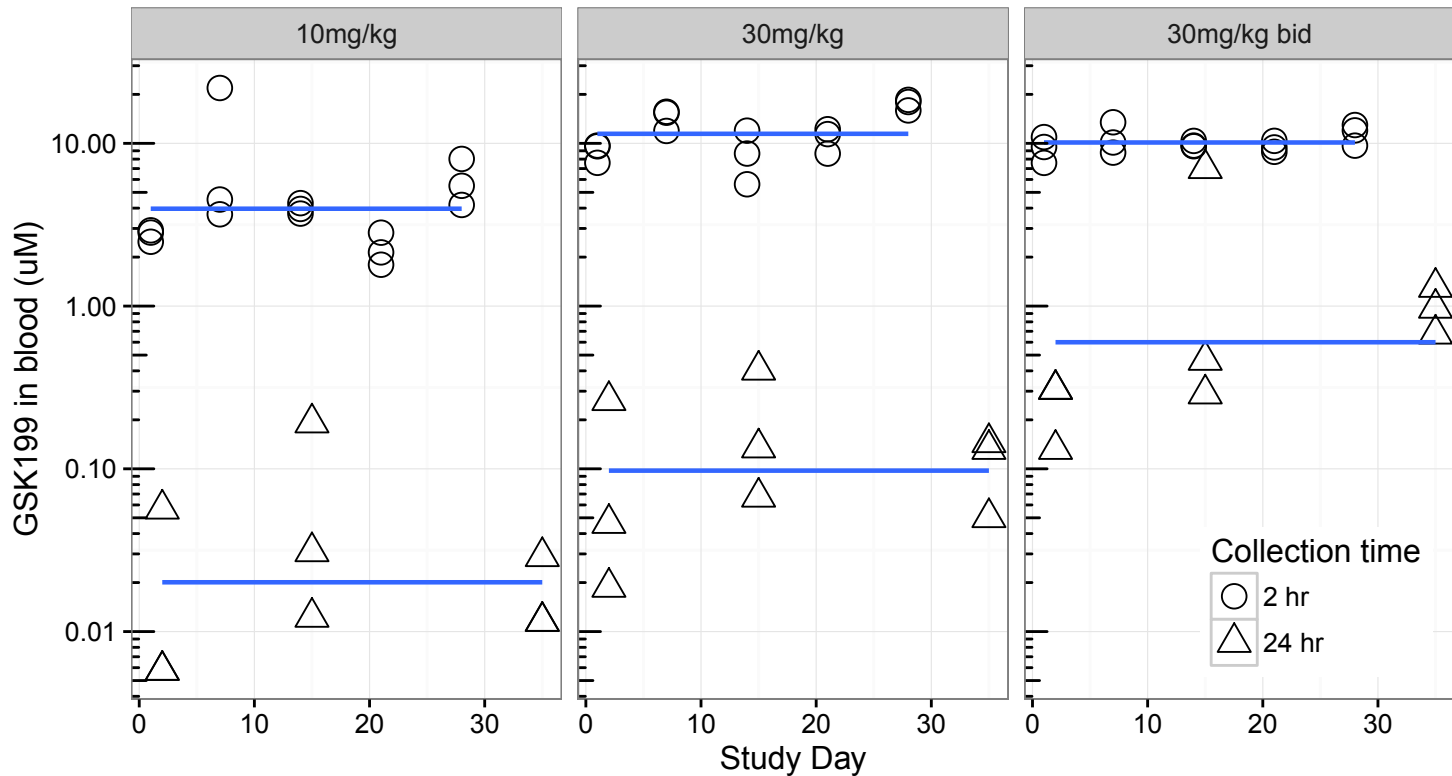

Supplementary Figure 5.

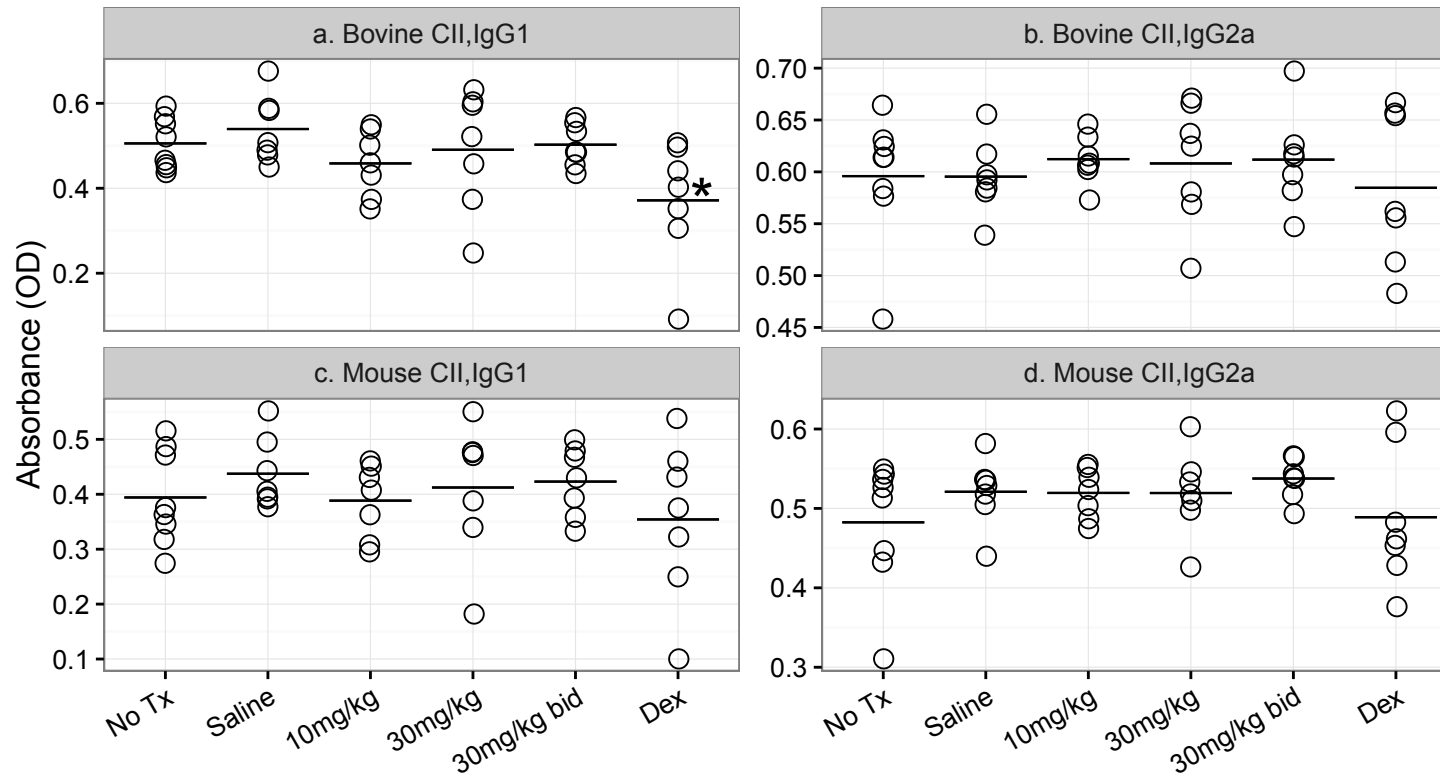

Supplement: CEI-188-263-s001.pdf [file CEI-188-263-s001.pdf]
